# Supplementary material for: Molecular mutations as a possible factor for determining extent of thyroid surgery
Source: J Otolaryngol Head Neck Surg. 2019 Oct 17;48:51. doi: 10.1186/s40463-019-0372-5 (PMC6796357; doi:10.1186/s40463-019-0372-5)
Supplement: Supplementary file 1 — Additional file 1. Krasner et al. raw data bank. [file 40463_2019_372_MOESM1_ESM.xlsx]

## Sheet: Sheet1
Unit #	Age	Gender	Histologic type	FNA	Size (U/S)	Size (Path)	ETE	ENE	LN	LVI	PNI	Tall Cell Variant	Solid Variant	Columnar Cell Variant	Hobnail Variant	BRAF V600E	BRAF K601E	HRAS	KRAS	NRAS	RET/PTC1	TERT	Pax8-Pparg	No Mutation	Additional	Year
1476801	42	F	Hobnail variant	6	0.8	1	0	0	1	0	0	0	0	0	1	1	0	0	0	0	0	0	0	0	LN 8+/8	2017
1017469 Pais 6451 1617	54	F	Classical	6	2.6	2	0	0	0	0	0	0	0	0	0	0	0	0	0	0	0	0	0	1		2018
1034754 Cags 8959 1319	27	F	Classical	6	1.2	1.3	1	0	1	0	0	0	0	0	0	1	0	0	0	0	0	0	0	0	LN 1+/4	2017
1064958 Flek 6560 1118	52	F	NIFTP	4	2.4	1.3	0	0	0	0	0	0	0	0	0	0	0	0	0	1	0	0	0	0		2017
1100805 antc 5762 1915	60	F	Classical	5	1.3	0.7	0	0	0	0	1	0	0	0	0	1	0	0	0	0	0	0	0	0		2018
1115905 betg 7960 0912	37	F	Follicular variant	6	1.5	1.7	0	0	0	0	0	0	0	0	0	1	0	0	0	0	0	0	0	0	0.7 cm carcinoma with ETE	2016
1149193 Kuck 8261 1919	34	F	Follicular variant	6	1.3	0.8	0	0	0	0	0	0	0	0	0	0	0	0	0	1	0	0	0	0		2017
1154146 kerm 7854 2412	39	F	Classical	6	1.2	1.2	0	0	1	0	0	0	0	0	0	1	0	0	0	0	0	0	0	0	LN 4+/5	2017
1209960 Dell 5105 2219	65	M	Follicular carcinoma	4	2.8	2.4	0	0	0	0	0	0	0	0	0	0	0	0	0	0	0	0	0	1		2017
1238035 malj 4301 1919	74	M	Follicular variant	5	3.9	4	0	0	0	0	0	0	0	0	0	0	0	0	0	0	0	0	0	1		2017
124175 surs 7204 1211	45	M	Classical	5	2.3	2.5	0	0	0	0	0	0	0	0	0	1	0	0	0	0	0	0	0	0		2017
1270044 Alza 4951 0118	68	F	Tall cell variant	6	2.2	2.2	1	0	0	0	0	1	0	0	0	0	0	0	0	0	0	1	0	0	+BRAF V600E	2017
1327618 Leei 7859 0615	38	F	Follicular variant	5	1.8	3.2	0	0	0	0	0	0	0	0	0	0	0	0	0	1	0	0	0	0		2017
1334084 Nasr 9110 2811	26	M	Follicular variant	5	1.2	1.2	0	0	0	0	0	0	0	0	0	0	1	0	0	0	0	0	0	0		2017
1336148 kalf 7753 0618	40	F	Classical	5	1.5	0.8	1	0	0	0	0	0	0	0	0	1	0	0	0	0	0	0	0	0		2018
1357299 tscp 6561 2710	52	F	NIFTP	3	2	1.9	0	0	0	0	0	0	0	0	0	0	0	0	0	1	0	0	0	0		2018
1365453 Venv 6505 0813	52	M	Follicular variant	4	1.4	1	0	0	0	0	0	0	0	0	0	0	0	0	0	0	0	0	1	0		2017
1372725 Nkic 7258 0813	44	F	Classical	6	3.2	3	0	0	1	0	0	0	0	0	0	0	0	0	0	0	0	0	0	1	LN 3+/4	2017
1383995 Powk 4654 2818	71	F	Tall cell variant	6	3.3	4.5	1	0	1	1	0	1	0	0	0	1	0	0	0	0	0	0	0	0	LN 5+/5	2017
1394452 Olid 6908 0713	48	M	Follicular variant	5	1.8	1.5	0	0	0	0	0	0	0	0	0	0	0	0	0	1	0	0	0	0	Follicular variant of PTC (FVPTC) with a minor solid component and does not qualify for the solid variant	2017
1404455 Levf 6307 2610	53	M	Follicular variant	5	3.4	4	0	0	0	0	0	0	0	0	0	0	0	0	0	0	0	0	0	1		2017
1409598 Leoa 2755 0913	89	F	Classical	6	1.4	1.2	0	0	0	0	0	0	0	0	0	1	0	0	0	0	0	0	0	0		2017
1416533 chay 5004 2012	67	M	Classical	6	1.1	1.2	0	0	0	0	0	0	0	0	0	0	0	0	0	0	0	0	0	1		2018
1432391 Liap 6906 1717	47	M	NIFTP	6	1.6	1.7	0	0	0	0	0	0	0	0	0	0	0	0	0	0	0	0	0	1		2017
1434485 sats 6952 2410	47	F	Classical	6	0.9	0.9	1	0	1	1	0	0	0	0	0	1	0	0	0	0	0	0	0	0	LN 2+/6	2017
1440015 Agbe 7157 3114	45	F	Classical	5	1.1	0.7	0	0	0	0	0	0	0	0	0	0	0	0	0	0	0	0	0	1		2017
1440037 Gaud 8260 2412	34	F	Classical	6	3.1	2	0	0	0	0	0	0	0	0	0	1	0	0	0	0	0	0	0	0		2016
1441253 Boim 7757 1813	39	F	Classical	6	0.9	0.3	0	0	0	0	0	0	0	0	0	0	0	0	0	0	0	0	0	1		2017
1443527 mohp 7859 2111	38	F	Follicular variant	3	1.1	1.2	0	0	0	0	0	0	0	0	0	0	0	0	0	0	0	0	0	1		2017
1444507 shuy 7753 1814	40	F	Follicular variant	5	2.3	2.4	0	0	0	0	0	0	0	0	0	0	0	0	0	0	0	0	0	1		2017
1445349 Savj 4602 2416	70	M	Follicular variant	6	2.5	1.1	0	0	0	0	0	0	0	0	0	0	0	0	0	0	0	0	0	1		2017
1448565 Disr 7207 1510	44	M	Follicular carcinoma	5	2.6	2.4	0	0	0	0	0	0	0	0	0	0	0	0	0	0	0	0	0	1		2017
1448567 Parj 6358 1216	53	F	Follicular variant	5	3.6	4.5	0	0	0	0	0	0	0	0	0	0	0	0	0	1	0	0	0	0		2017
1452589 Zhay 7551 2812	42	F	Oncocytic	4	1.3	0.5	0	0	0	0	0	0	0	0	0	0	0	0	0	0	0	0	0	1		2017
1452613 BOUI 7756 1915	39	F	Classical	6	2.5	2.5	1	0	1	0	0	0	0	0	0	1	0	0	0	0	0	0	0	0	LN 11+/14	2017
1453837 farv 8854 1713	29	F	Tall cell variant	6	1.4	1.4	1	0	1	1	0	1	0	0	0	1	0	0	0	0	0	0	0	0	LN 4+/7	2017
1460837 Fazz 7503 0912	42	M	Classical	6	1.1	1.1	0	0	1	1	0	0	0	0	0	1	0	0	0	0	0	0	0	0	LN 2+/3	2017
1465911 Mora 9612 0415	21	M	Follicular variant	5	1.3	1.6	0	0	0	1	0	0	0	0	0	0	1	0	0	0	0	0	0	0		2018
1466228 Dann 9654 1219	21	F	Follicular variant	6	2.8	2.5	0	0	0	1	0	0	0	0	0	0	0	1	0	0	0	0	0	0	Follicular variant of PTC (FVPTC) with a minor solid component and does not qualify for the solid variant	2017
1469873 meac 8452 1818	34	F	Columnar cell	6	3.1	2.6	0	0	0	1	0	0	0	1	0	0	0	0	0	1	0	0	0	0		2018
1472833 Elfa 6259 0213	55	F	Follicular variant	6	2.9	3.5	0	0	0	0	0	0	0	0	0	1	0	0	0	0	0	0	0	0		2017
1474645 lais 5761 1616	60	F	Classical	5	2.3	2.5	0	0	0	0	0	0	0	0	0	0	0	0	0	0	0	0	0	1		2017
1474648 Jutm 7662 2419	40	F	Follicular variant	4	1.5	1.3	0	0	0	0	0	0	0	0	0	0	0	0	0	0	0	0	0	1		2017
14750 Sche 3557 2010	82	F	Follicular variant	4	1.2	0.7	0	0	0	0	0	0	0	0	0	0	1	0	0	0	0	0	0	0		2017
1488012 Gokr 7356 1213	44	F	Follicular variant	3	1.7	2.3	0	0	0	0	0	0	0	0	0	0	0	0	0	1	0	0	0	0		2018
156164 Hayp 6155 2615	55	F	Follicular variant	5	2.31	2.2	0	0	0	0	0	0	0	0	0	0	0	0	0	0	0	0	0	1		2017
177462 Leim 5454 2516	62	F	Classical	6	1.4	0.7	0	0	0	1	0	0	0	0	0	0	0	0	0	0	0	0	0	1		2017
183534 Broe 7560 1917	41	F	Classical	6	1.2	2.2	0	0	1	1	0	0	0	0	0	1	0	0	0	0	0	0	0	0	LN 1+/2	2017
203683 Helj 5154 1414	66	F	Follicular variant	4	2	3.4	0	0	0	0	0	0	0	0	0	0	0	0	0	0	0	1	0	0	+N-RAS	2017
2086701 Iant 7954 2510	38	F	Oncocytic	4	1.5	1	0	0	0	0	0	0	0	0	0	0	0	0	0	0	0	0	0	1		2018
210316 Pref 7754 0614	40	F	Classical	5	3.1	2.7	0	0	0	0	0	0	0	0	0	0	0	0	0	0	0	0	0	1		2018
2141438 Latc 6558 0612	52	F	Classical	4	3.5	<0.5	0	0	0	0	0	0	0	0	0	0	0	0	0	0	0	0	0	1		2017
246889 lizc 5362 2517	63	F	Classical	6	1.2	1.2	0	0	1	0	0	0	0	0	0	0	0	0	0	0	0	0	0	1	LN 1+/1	2017
254528 scrv 7960 0413	37	F	Follicular variant	5	2.2	2.3	0	0	0	0	0	0	0	0	0	0	0	0	0	0	0	0	0	1		2017
271523 Ausc 5258 1311	65	F	solid variant	5	3.9	3.6	0	0	0	0	0	0	1	0	0	0	0	0	0	0	0	0	0	1		2018
326067 Imxr 8260 0419	34	F	Classical	6	2.9	2.5	1	0	1	1	1	0	0	0	0	1	0	0	0	0	0	0	0	0	LN 8+/16	2017
331846 Gued 6459 0212	53	F	Follicular variant	6	1.6	1.5	0	0	0	0	0	0	0	0	0	0	0	0	1	0	0	0	0	0		2017
35446 digm 6158 0111	56	F	Follicular variant	5	1.5	1.3	0	0	1	0	0	0	0	0	0	1	0	0	0	0	0	0	0	0	LN 1+/2	2018
386873 Wiza 6568 1218	51	F	Classical	6	2.8	1.7	1	0	0	0	0	0	0	0	0	1	0	0	0	0	0	0	0	0	micropap with ETE	2016
402815 beam 8653 0216	31	F	Classical	6	1.6	1.4	0	0	1	1	0	0	0	0	0	1	0	0	0	0	0	0	0	0	LN 1+/5	2017
440516 Papa 7061 0210	46	F	Classical	6	1.8	1.5	0	0	1	0	0	0	0	0	0	0	0	0	0	0	1	0	0	0	LN 1+/3	2017
444482 Graa 6861 2514	49	F	NIFTP	4	1.5	1	0	0	0	0	0	0	0	0	0	0	0	0	0	0	0	0	0	1		2018
476277 Aled 6004 2612	57	M	Follicular variant	3	1.6	1	0	0	1	0	0	0	0	0	0	0	0	1	0	0	0	0	0	0	LN 1+/2	2018
482037 Marf 7106 1716	45	M	Follicular carcinoma	4	1.9	0.6	0	0	0	0	0	0	0	0	0	0	0	0	0	0	0	0	0	1		2017
49863 Basa 6511 1113	52	M	NIFTP	5	1.8	1.7	0	0	0	0	0	0	0	0	0	0	0	0	0	0	0	0	0	1		2017
505563 Divt 6557 2113	52	F	Follicular variant	5	0.6	0.5	1	0	0	0	1	0	0	0	0	0	0	0	0	0	0	0	0	1		2017
515203 Rutt 7153 2013	46	F	Follicular variant	4	1.5	1	0	0	0	0	0	0	0	0	0	0	0	0	0	0	0	0	0	1		2017
5185877 Giup 7703 0510	40	M	Follicular variant	3	2.1	1.5	0	0	0	0	0	0	0	0	0	0	0	0	0	1	0	0	0	0		2017
5236992 Harg 8359 2117	34	F	Tall cell variant	6	1.6	1.7	0	0	0	1	0	1	0	0	0	1	0	0	0	0	0	0	0	0		2018
5266642 Siba 9052 2412	27	F	Columnar cell	6	1.6	1.3	1	0	0	1	0	0	0	1	0	1	0	0	0	0	0	0	0	0		2017
527391 parc 4662 0313	70	F	Oncocytic	6	1.7	1.8	0	0	0	0	0	0	0	0	0	0	0	0	0	0	0	0	0	1		2017
5274678 Huos 7110 2115	45	M	Follicular variant	6	2.2	1.7	0	0	0	0	0	0	0	0	0	0	0	0	1	0	0	0	0	0		2017
5290286 Rail 5158 1019	65	F	Hurthle cell	4	4.9	4.9	0	0	0	1	0	0	0	0	0	0	0	0	0	0	0	0	0	1		2017
529723 Gauy 4808 1817	68	M	Classical	6	0.8	0.8	0	0	1	0	0	0	0	0	0	1	0	0	0	0	0	0	0	0	LN 2+/3	2017
5313111 Mara 7702 0814	40	M	Classical	3	3.8	0.7	0	0	0	0	0	0	0	0	0	0	0	0	0	0	0	0	0	1		2017
5316268 Dimn 7853 3017	39	F	NIFTP	4	7.4	5	0	0	0	0	0	0	0	0	0	0	0	0	0	1	0	0	0	0		2017
5349837 Pata 7361 0718	44	F	Classical	3	N/A	0.3	0	0	0	0	0	0	0	0	0	0	0	0	0	0	0	0	0	1		2018
56584 Jacc 6659 2014	51	F	Follicular variant	3	2.5	2.5	0	0	0	0	0	0	0	0	0	0	0	1	0	0	0	0	0	0		2018
570322 Posm 9358 0513	23	F	Follicular variant	6	1.5	1.8	0	0	0	0	0	0	0	0	0	0	0	0	0	0	0	0	0	1		2017
57268 sina 5751 0819	59	F	Follicular variant	5	1	0.8	0	0	1	0	0	0	0	0	0	0	1	0	0	0	0	0	0	0	LN 1+/2	2016
605115 andk 5251 1015	66	F	NIFTP	3	2.7	2.5	0	0	0	0	0	0	0	0	0	0	0	0	0	0	0	0	0	1		2018
622346 Spaa 6908 0714	48	M	Follicular variant	5	0.9	1.2	0	0	1	0	0	0	0	0	0	0	0	0	1	0	0	0	0	0	LN 1+/3	2018
623402 Sell 9510 3013	20	M	Classical	6	1.1	0.6	0	0	0	0	0	0	0	0	0	1	0	0	0	0	0	0	0	0		2016
644136 Aves 6659 3015	50	F	Classical	5	2.6	3	0	0	0	0	0	0	0	0	0	0	0	0	0	0	0	0	0	1		2017
659807 sbra 7154 2011	46	F	Classical	6	1.2	1.1	0	0	0	0	0	0	0	0	0	1	0	0	0	0	0	0	0	0		2017
671527 Arvn 6705 1411	49	M	Classical	6	2.5	2.9	1	1	1	1	0	0	0	0	0	1	0	0	0	0	0	0	0	0	LN 4+/6	2016
677279 cict 6754 1519	50	F	Classical	6	1.6	2	0	0	0	0	0	0	0	0	0	1	0	0	0	0	0	0	0	0		2018
687251 Tric 6753 1110	50	F	Classical	6	1.4	1.5	0	0	0	0	0	0	0	0	0	0	0	0	0	0	0	0	0	1		2018
745797 Mohl 6759 1016	50	F	Classical	5	2.3	1.9	0	0	0	0	0	0	0	0	0	0	0	0	0	0	0	0	0	1		2017
755709 eidt 6012 0310	56	M	Oncocytic	6	2.4	2.2	0	0	0	0	0	0	0	0	0	0	0	0	0	0	0	0	0	1	Follicular variant of PTC (FVPTC) with a minor solid component and does not qualify for the solid variant	2017
759154 Lupm 7203 1219	45	M	Classical	6	1.8	1.1	0	0	0	0	0	0	0	0	0	1	0	0	0	0	0	0	0	0		2017
807065 Pomj 6509 2011	51	M	Classical	3	3	0.1	0	0	0	0	0	0	0	0	0	0	0	0	0	0	0	0	0	1		2017
831974 Madd 7612 2016	40	M	Follicular variant	6	3	2.4	0	0	0	1	0	0	0	0	0	0	0	0	0	0	0	0	0	1		2017
845971 Lext 4254 1914	75	F	Tall cell variant	6	2.9	2.8	1	0	0	1	1	1	0	0	0	1	0	0	0	0	0	0	0	0		2017
873141 Ners 4359 1016	73	F	Columnar cell	6	3.1	2.9	0	0	0	1	0	1	0	1	0	1	0	0	0	0	0	0	0	0		2017
87661 Fria 6909 0616	47	M	Follicular variant	5	2.2	2.3	1	0	0	1	0	0	0	0	0	0	0	0	0	1	0	0	0	0		2017
877688 mete 2590 0719	65	F	NIFTP	5	1.7	1.6	0	0	0	0	0	0	0	0	0	0	0	0	0	0	0	0	0	1		2018
916047 kacn 6560 2917	51	F	Follicular variant	5	3	3.7	0	0	0	0	0	0	0	0	0	0	0	0	0	0	0	0	0	1		2017
936792 Efrt 6811 1113	47	M	Classical	6	1.3	1	0	0	0	0	0	0	0	0	0	1	0	0	0	0	0	0	0	0		2016
955600 Phat 4856 0511	69	F	Classical	5	4.6	5.5	0	0	0	1	0	0	0	0	0	0	0	1	0	0	0	0	0	0	Follicular variant of PTC (FVPTC) with a minor solid component and does not qualify for the solid variant	2018
972922 garh 4209 0914	75	M	Follicular carcinoma	4	2.9	2.7	0	0	0	0	0	0	0	0	0	0	0	0	0	0	0	0	0	1		2018
97829 Anac 7055 2613	46	F	Classical	6	0.9	0.8	1	0	1	1	0	0	0	0	0	1	0	0	0	0	0	0	0	0	LN 3+/3	2017
991225 Bonl 5255 1213	64	F	Classical	5	0.9	1.1	1	0	0	0	0	0	0	0	0	0	0	0	0	0	0	0	0	1		2017
